# Supplementary material
Source: publisher site journal article supplement (https://www.dovepress.com/article/supplementary_file/578094/578091_Appendix%201_.docx)
Supplement: Supplementary file 1 [file 578091_Appendix%201_.docx]

**Appendix 1: Search strategy**

**Search conducted on August 28, 2024**

| **PubMed** | |
| --- | --- |
| #1 | cardiovascular disease[MeSH Terms] |
| #2 | coronary disease[MeSH Terms] |
| #3 | (((((Coronary Disease[Title/Abstract]) OR (cardiac disease[Title/Abstract])) OR (CVD*[Title/Abstract])) OR (coronary heart disease*[Title/Abstract])) OR (CHD*[Title/Abstract])) OR (circulation system diseases*[Title/Abstract]) |
| #4 | #1 OR #2 OR #3 |
| #5 | (((((((physical activity intentions[Title/Abstract]) OR (exercise intention[Title/Abstract])) OR (exercise intentionality[Title/Abstract])) OR (Exercise behavioral intention[Title/Abstract])) OR (Cardiac rehabilitation willingness[Title/Abstract])) OR (Cardiac rehabilitation intent[Title/Abstract])) OR (Exercise behavior expectation[Title/Abstract])) OR (exercise motivation[Title/Abstract]) |
| #6 | #4 AND #5 |

| **Web of Science** | |
| --- | --- |
| #1 | TS=(cardiovascular disease or coronary disease or Coronary Disease or cardiac disease or CVD* or coronary heart disease or CHD* or circulation system diseases*) and Preprint Citation Index (Exclude – Database) |
| #2 | ((TI=(physical activity intentions or exercise intention or exercise intentionality or Exercise behavioral intention or Cardiac rehabilitation willingness or Cardiac rehabilitation intent or Exercise behavior expectation or exercise motivation))) OR AB=(physical activity intentions or exercise intention or exercise intentionality or Exercise behavioral intention or Cardiac rehabilitation willingness or Cardiac rehabilitation intent or Exercise behavior expectation or exercise motivation) |
| #3 | #1 AND #2 |

| **Cochrane Library** | |
| --- | --- |
| #1 | MeSH descriptor: [Cardiovascular Diseases] explode all trees |
| #2 | MeSH descriptor: [Coronary Disease] explode all trees |
| #3 | Coronary Disease):ti,ab,kw OR (cardiac disease):ti,ab,kw OR(CVD*):ti,ab,kw OR (coronary heart disease*):ti,ab,kw OR (CHD*):ti,ab,kw |
| #4 | (circulation system diseases"):ti,ab,kw AND(Cardiovascular Diseases):ti.ab,kw |
| #5 | #1 OR #2 OR #3 OR #4 |
| #6 | (physical activity intention):ti,ab,kw OR(exercise intention):ti,ab,kw OR (exercise intentionality):ti,ab,kw OR (Exercise behavioral intention):ti,ab,kw OR  (Cardiac rehabilitation willingness):ti,ab.kw |
| #7 | (Cardiac rehabilitation intent):ti,ab,kw OR (Exercise behavior expectation):ti,ab,kw OR (exercise motivation):ti,ab,kw |
| #8 | #6 OR #7 |
| #9 | #5 AND #8 |

| **Embase** | |
| --- | --- |
| #1 | 'cardiovascular disease'/exp OR 'cardiovascular disease' OR 'coronary artery disease'/exp OR 'coronary artery disease' |
| #2 | 'Coronary Disease' or cardiac disease or CVD* or coronary heart disease* or CHD* or circulation system diseases*' |
| #3 | 'coronary disease':ab,ti or 'cardiac disease':ab,ti or 'CVD* ':ab,ti or 'coronary heart disease*':ab,ti or 'circulation system diseases*':ab,ti |
| #4 | #1 OR #2 OR #3 |
| #5 | 'physical activity intention':ab,ti OR 'exercise intention':ab,ti OR 'exercise intentionality':ab,ti OR 'exercise behavioral intention':ab,ti OR 'cardiac rehabilitation willingness':ab,ti OR 'cardiac rehabilitation intent':ab,ti OR 'exercise behavior expectation':ab,ti OR 'exercise motivation':ab,ti |
| #6 | #4 OR #5 |

| **EBSCO** | |
| --- | --- |
| #1 | SU ( Cardiovascular Diseases or Coronary Disease ) OR TI ( Coronary Disease or cardiac disease or CVD* or coronary heart disease* or CHD* or circulation system diseases* ) OR AB ( Coronary Disease or cardiac disease or CVD* or coronary heart disease* or CHD* or circulation system diseases* ) |
| #2 | TX (physical activity intention or exercise intention or exercise intentionality or Exercise behavioral intention or Cardiac rehabilitation willingness or Cardiac rehabilitation intent or Exercise behavior expectation or exercise motivation) |
| #3 | #1 AND #2 |

| **Scopus** | |
| --- | --- |
| #1 | ( TITLE-ABS-KEY ( "cardiovascular diseases" ) OR TITLE-ABS-KEY ( "coronary disease" ) OR TITLE-ABS-KEY ( "coronary disease" ) OR TITLE-ABS-KEY ( "cardiac disease" ) OR TITLE-ABS-KEY ( "cvd*" ) OR TITLE-ABS-KEY ( "coronary heart disease*" ) OR TITLE-ABS-KEY ( "chd*" ) OR TITLE-ABS-KEY ( "circulation system diseases*" ) ) |
| #2 | ( TITLE-ABS-KEY ( "physical activity intention" ) OR TITLE-ABS-KEY ( "exercise intention" ) OR TITLE-ABS-KEY ( "exercise intentionality" ) OR TITLE-ABS-KEY ( "exercise behavioral intention" ) OR TITLE-ABS-KEY ( "cardiac rehabilitation willingness" ) OR TITLE-ABS-KEY ( "cardiac rehabilitation intent" ) OR TITLE-ABS-KEY ( "exercise behavior expectation" ) OR TITLE-ABS-KEY ( "exercise motivation" ) ) |
| #3 | #1 AND #2 |

| **OpenGrey** |
| --- |
| (cardiovascular diseases OR coronary disease) AND (exercise intention) |

| **CNKI** | |
| --- | --- |
| #1 | SU=('cardiovascular disease' + 'heart disease' + 'coronary heart disease' + 'circulatory system disease') |
| #2 | SU=('exercise rehabilitation intention' + 'exercise rehabilitation willingness' + 'exercise training willingness' + 'exercise training intention' + 'cardiac rehabilitation willingness') |
| #3 | #1 AND #2 |

| **Wanfang** | |
| --- | --- |
| #1 | (Subject: ("cardiovascular disease") OR Subject: ("heart disease") OR Subject: ("coronary heart disease") OR Subject: ("circulatory system disease")) |
| #2 | (Subject:("exercise rehabilitation intention") OR Subject:("exercise rehabilitation willingness") OR Subject:("exercise training willingness") OR Subject:("exercise training intention") OR Subject:("cardiac rehabilitation willingness")) |
| #3 | #1 AND #2 |

| **VIP** | |
| --- | --- |
| #1 | M=(cardiovascular disease OR heart disease OR coronary heart disease OR circulatory system disease) |
| #2 | M=(exercise rehabilitation intention OR exercise rehabilitation willingness OR exercise training willingness OR exercise training intention OR cardiac rehabilitation willingness) |
| #3 | #1 AND #2 |

| **Sinomed** | |
| --- | --- |
| #1 | ("cardiovascular disease"[Common Field: Smart] OR "heart disease"[Common Field: Smart] OR "coronary heart disease"[Common Field: Smart] OR "circulatory system disease"[Common Field: Smart]) |
| #2 | ("exercise rehabilitation intention"[Common Field: Smart] OR "exercise rehabilitation willingness"[Common Field: Smart] OR "exercise training willingness"[Common Field: Smart] OR "exercise training intention"[Common Field: Smart] OR "cardiac rehabilitation willingness"[Common Field: Smart]) |
| #3 | #1 AND #2 |
